# Supplementary material
Source: Copernicus journal article supplement (doi:10.5194/egusphere-2026-1919)
Supplement: Supplementary file 1 [file egusphere-2026-1919-supplement.pdf]

## Supplementary Materials

### Table SM1: GCAM-China-v8 Model Overview (Reference Card)

The tables below provide a concise, high-level overview of GCAM-China, summarizing key model structures, assumptions, and implementation details. For clarity and ease of reference, the tables are organized into six thematic sections.

- Table SM1A: Model scope and methods
- Table SM1B: Socio-economic drivers and macro-economy
- Table SM1C: Energy Supply and Transformation
- Table SM1D: Energy end-use
- Table SM1E: Land use
- Table SM1F: Emissions, climate, and impacts

**Table SM1A: Model scope and methods**

| Dimension          | Sub-Dimension | Endogenous | Exogenous | Not Included | Details                                                                                                                                                                                                                                                                                                                                                                                                                                                                                                                                                                                                                                                                                                                                                                                               |
|--------------------|---------------|------------|-----------|--------------|-------------------------------------------------------------------------------------------------------------------------------------------------------------------------------------------------------------------------------------------------------------------------------------------------------------------------------------------------------------------------------------------------------------------------------------------------------------------------------------------------------------------------------------------------------------------------------------------------------------------------------------------------------------------------------------------------------------------------------------------------------------------------------------------------------|
| Model type         |               |            |           |              | global multisector model                                                                                                                                                                                                                                                                                                                                                                                                                                                                                                                                                                                                                                                                                                                                                                              |
| Geographical scope |               |            |           |              | global                                                                                                                                                                                                                                                                                                                                                                                                                                                                                                                                                                                                                                                                                                                                                                                                |
| Objective          |               |            |           |              | GCAM-China is a comprehensive integrated assessment model designed to represent coupled human–Earth system dynamics within a unified global framework. It combines economic activity with energy, water, and land system representations in a cross-sectorally consistent manner, while remaining computationally lightweight enough for execution on personal computers and for extensive exploration of alternative scenarios and uncertainties. Although grounded in economic theory, the model is formulated in physical units—such as energy, water volumes, and land area—and its individual components employ process-based formulations informed by current scientific understanding, with an intentional level of aggregation that favors system-wide integration over fine sectoral detail. |
| Solution concept   |               |            |           |              | Partial equilibrium (price elastic demand)                                                                                                                                                                                                                                                                                                                                                                                                                                                                                                                                                                                                                                                                                                                                                            |
| Solution horizon   |               |            |           |              | Recursive dynamic (myopic)                                                                                                                                                                                                                                                                                                                                                                                                                                                                                                                                                                                                                                                                                                                                                                            |

|                   |                                 |   |  |                                                                                                                                                                                                                                                                                                                                                                                                                                                                                                                                                                                                                                                                                                                                                                                                                                                                                                                                                                              |
|-------------------|---------------------------------|---|--|------------------------------------------------------------------------------------------------------------------------------------------------------------------------------------------------------------------------------------------------------------------------------------------------------------------------------------------------------------------------------------------------------------------------------------------------------------------------------------------------------------------------------------------------------------------------------------------------------------------------------------------------------------------------------------------------------------------------------------------------------------------------------------------------------------------------------------------------------------------------------------------------------------------------------------------------------------------------------|
| Anticipation      |                                 |   |  | GCAM-China is implemented using a recursive dynamic framework, in which the model advances sequentially through time. At each simulation step, system responses are determined by information available at that point—such as current market signals, policy settings, and resource availability—without incorporating expectations about future outcomes. The resulting state of the system is then carried forward, with accumulated investments, resource use, and land allocation forming the starting conditions for subsequent steps, thereby governing the model's long-term evolution.                                                                                                                                                                                                                                                                                                                                                                               |
| Spatial Dimension |                                 |   |  | GCAM-China is a China-focused version of GCAM that disaggregates the energy-economic system of the China region into 31 province-level sub-regions and six electricity grid regions that are also embedded in the global GCAM model. Electricity generation and end-use energy demand (buildings, transportation, and industry) are modeled at the provincial level in GCAM-China, and the model allows for electricity trade within grid regions. Renewable energy resources (hydro, solar, and wind) and carbon storage resources are also provincial-specific. Primary production of fossil resources including oil, gas, and coal, as well as other energy transformation sectors (hydrogen, gas, and refined liquids production) are still modeled at the aggregate national level. Agricultural and land use activities, including the supply of biomass energy feedstocks (residues and dedicated energy crops) are modeled at the level of 22 water basins in China. |
| Policies          | Emission tax                    | x |  |                                                                                                                                                                                                                                                                                                                                                                                                                                                                                                                                                                                                                                                                                                                                                                                                                                                                                                                                                                              |
|                   | Emission pricing                | x |  |                                                                                                                                                                                                                                                                                                                                                                                                                                                                                                                                                                                                                                                                                                                                                                                                                                                                                                                                                                              |
|                   | Cap and trade                   | x |  |                                                                                                                                                                                                                                                                                                                                                                                                                                                                                                                                                                                                                                                                                                                                                                                                                                                                                                                                                                              |
|                   | Fuel taxes                      | x |  |                                                                                                                                                                                                                                                                                                                                                                                                                                                                                                                                                                                                                                                                                                                                                                                                                                                                                                                                                                              |
|                   | Fuel subsidies                  | x |  |                                                                                                                                                                                                                                                                                                                                                                                                                                                                                                                                                                                                                                                                                                                                                                                                                                                                                                                                                                              |
|                   | Feed-in-tariff                  | x |  |                                                                                                                                                                                                                                                                                                                                                                                                                                                                                                                                                                                                                                                                                                                                                                                                                                                                                                                                                                              |
|                   | Portfolio standard              | x |  |                                                                                                                                                                                                                                                                                                                                                                                                                                                                                                                                                                                                                                                                                                                                                                                                                                                                                                                                                                              |
|                   | Capacity targets                | x |  |                                                                                                                                                                                                                                                                                                                                                                                                                                                                                                                                                                                                                                                                                                                                                                                                                                                                                                                                                                              |
|                   | Emission standards              | x |  |                                                                                                                                                                                                                                                                                                                                                                                                                                                                                                                                                                                                                                                                                                                                                                                                                                                                                                                                                                              |
|                   | Energy efficiency standards     | x |  |                                                                                                                                                                                                                                                                                                                                                                                                                                                                                                                                                                                                                                                                                                                                                                                                                                                                                                                                                                              |
|                   | Agricultural producer subsidies | x |  |                                                                                                                                                                                                                                                                                                                                                                                                                                                                                                                                                                                                                                                                                                                                                                                                                                                                                                                                                                              |
|                   | Agricultural consumer subsidies | x |  |                                                                                                                                                                                                                                                                                                                                                                                                                                                                                                                                                                                                                                                                                                                                                                                                                                                                                                                                                                              |
|                   | Land protection                 | x |  |                                                                                                                                                                                                                                                                                                                                                                                                                                                                                                                                                                                                                                                                                                                                                                                                                                                                                                                                                                              |

|  |                       |   |  |  |  |
|--|-----------------------|---|--|--|--|
|  | Pricing carbon stocks | x |  |  |  |
|--|-----------------------|---|--|--|--|

**Table SM1B: Socio-economic drivers and macro-economy**

| Dimension                           | Sub-Dimension                       | Endogenous | Exogenous | Not Included | Details                                                                                                                                                                                                       |
|-------------------------------------|-------------------------------------|------------|-----------|--------------|---------------------------------------------------------------------------------------------------------------------------------------------------------------------------------------------------------------|
| Population                          |                                     |            | x         |              |                                                                                                                                                                                                               |
| Population age structure            |                                     |            |           | x            |                                                                                                                                                                                                               |
| Education level                     |                                     |            |           | x            |                                                                                                                                                                                                               |
| Urbanization rate                   |                                     |            |           | x            |                                                                                                                                                                                                               |
| GDP                                 |                                     |            | x         |              |                                                                                                                                                                                                               |
| Income distribution                 |                                     |            |           | x            | Can be included; not included by default                                                                                                                                                                      |
| Employment rate                     |                                     |            | x         |              |                                                                                                                                                                                                               |
| Labor productivity                  |                                     |            | x         |              |                                                                                                                                                                                                               |
| Total factor productivity           |                                     |            | x         |              |                                                                                                                                                                                                               |
| Economic sectors                    |                                     |            |           |              | Energy, industry, transportation, residential, commercial, agriculture, forestry                                                                                                                              |
| Trade                               | Coal                                | x          |           |              | Heckscher-Ohlin (H-O) / Armington hybrid                                                                                                                                                                      |
|                                     | Oil                                 | x          |           |              | Heckscher-Ohlin (H-O) / Armington hybrid                                                                                                                                                                      |
|                                     | Gas                                 | x          |           |              | Heckscher-Ohlin (H-O) / Armington hybrid                                                                                                                                                                      |
|                                     | Uranium                             | x          |           |              | Heckscher-Ohlin (H-O)                                                                                                                                                                                         |
|                                     | Electricity                         | x          |           | x            | Electricity generation and end-use energy demand (buildings, transportation, and industry) are modeled at the provincial level in GCAM-China, and the model allows for electricity trade within grid regions. |
|                                     | Bioenergy crops                     | x          |           |              |                                                                                                                                                                                                               |
|                                     | Food crops                          | x          |           |              |                                                                                                                                                                                                               |
|                                     | Emissions                           | x          |           |              | Emissions markets can be set up to permit or restrict trading.                                                                                                                                                |
| Institutional and political factors | Early retirement of capital allowed | x          |           |              |                                                                                                                                                                                                               |
|                                     | Interest rates differentiated by    |            | x         |              | Homogenous by default but can be differentiated.                                                                                                                                                              |

|                      |                                                       |   |   |  |                                                                                                                                                                                                                                                    |
|----------------------|-------------------------------------------------------|---|---|--|----------------------------------------------------------------------------------------------------------------------------------------------------------------------------------------------------------------------------------------------------|
|                      | country/region                                        |   |   |  |                                                                                                                                                                                                                                                    |
|                      | Regional risk factors included                        |   | x |  | Homogenous by default but can be differentiated.                                                                                                                                                                                                   |
|                      | Technology costs differentiated by country/region     |   | x |  | Homogenous by default but can be differentiated.                                                                                                                                                                                                   |
|                      | Technological change differentiated by country/region |   | x |  | Homogenous by default but can be differentiated.                                                                                                                                                                                                   |
|                      | Behavioral change differentiated by country/region    |   | x |  | Varies by sector. By default, technology preferences evolve homogenously across regions for some sectors/technologies and are differentiated for others (e.g., nuclear power). Technology preferences and behavioral change can be differentiated. |
| Resource use         | Coal                                                  | x |   |  |                                                                                                                                                                                                                                                    |
|                      | Conventional oil                                      | x |   |  |                                                                                                                                                                                                                                                    |
|                      | Unconventional oil                                    | x |   |  |                                                                                                                                                                                                                                                    |
|                      | Conventional gas                                      | x |   |  |                                                                                                                                                                                                                                                    |
|                      | Unconventional gas                                    | x |   |  |                                                                                                                                                                                                                                                    |
|                      | Uranium                                               | x |   |  |                                                                                                                                                                                                                                                    |
|                      | Bioenergy                                             | x |   |  |                                                                                                                                                                                                                                                    |
|                      | Water                                                 | x |   |  |                                                                                                                                                                                                                                                    |
|                      | Raw materials                                         | x |   |  | Limestone for cement production                                                                                                                                                                                                                    |
| Land                 | x                                                     |   |   |  |                                                                                                                                                                                                                                                    |
| Technological change | Energy conversion technologies                        |   | x |  |                                                                                                                                                                                                                                                    |
|                      | Energy End-use                                        |   | x |  |                                                                                                                                                                                                                                                    |
|                      | Material Use                                          |   | x |  |                                                                                                                                                                                                                                                    |
|                      | Agriculture                                           |   | x |  |                                                                                                                                                                                                                                                    |

**Table SM1C: Energy Supply and Transformation**

| Dimension                      | Sub-Dimension                      | Endogenous | Exogenous | Not Included | Details                                                                                             |
|--------------------------------|------------------------------------|------------|-----------|--------------|-----------------------------------------------------------------------------------------------------|
| Energy technology substitution | Energy technology choice           |            |           |              | Logit choice model                                                                                  |
|                                | Energy technology substitutability |            |           |              | Mixed high and low substitutability                                                                 |
| Electricity technologies       | Coal w/o CCS                       | x          |           |              | conventional and integrated gasification combined cycle (IGCC)                                      |
|                                | Coal w/ CCS                        | x          |           |              | conventional and IGCC                                                                               |
|                                | Gas w/o CCS                        | x          |           |              | combined cycle (CC), steam turbine (ST), and combustion turbine (CT)                                |
|                                | Gas w/ CCS                         | x          |           |              | CC                                                                                                  |
|                                | Oil w/o CCS                        | x          |           |              | combined cycle (CC) and steam/CT                                                                    |
|                                | Oil w/ CCS                         | x          |           |              | CC                                                                                                  |
|                                | Bioenergy w/o CCS                  | x          |           |              | conventional and IGCC                                                                               |
|                                | Bioenergy w/ CCS                   | x          |           |              | conventional and IGCC                                                                               |
|                                | Geothermal power                   |            |           | x            | geothermal is not available in all provinces; deployment is endogenous in regions outside the China |
|                                | Nuclear power                      | x          |           |              | generation II (historic) and III (next gen)                                                         |
|                                | Solar power                        | x          |           |              | central PV, distributed PV, CSP                                                                     |
|                                | Wind power                         | x          |           |              | onshore, offshore                                                                                   |
|                                | Hydroelectric power                |            |           | x            |                                                                                                     |
| Ocean power                    |                                    |            |           | x            |                                                                                                     |
| Hydrogen production            | Coal to hydrogen w/o CCS           | x          |           |              |                                                                                                     |
|                                | Coal to hydrogen w/ CCS            | x          |           |              |                                                                                                     |
|                                | Natural gas to hydrogen w/o CCS    | x          |           |              |                                                                                                     |
|                                | Natural gas to hydrogen w/ CCS     | x          |           |              |                                                                                                     |
|                                | Oil to hydrogen w/o                |            |           |              | x                                                                                                   |

|                 |                                 |   |  |   |  |
|-----------------|---------------------------------|---|--|---|--|
|                 | CCS                             |   |  |   |  |
|                 | Oil to hydrogen w/ CCS          |   |  | x |  |
|                 | Biomass to hydrogen w/o CCS     | x |  |   |  |
|                 | Biomass to hydrogen w/ CCS      | x |  |   |  |
|                 | Nuclear thermochemical hydrogen | x |  |   |  |
|                 | Solar thermochemical hydrogen   |   |  | x |  |
|                 | Electrolysis                    | x |  |   |  |
| Refined liquids | Coal to liquids w/o CCS         | x |  |   |  |
|                 | Coal to liquids w/ CCS          | x |  |   |  |
|                 | Gas to liquids w/o CCS          | x |  |   |  |
|                 | Gas to liquids w/ CCS           |   |  | x |  |
|                 | Bioliqids w/o CCS               | x |  |   |  |
|                 | Bioliqids w/ CCS                | x |  |   |  |
|                 | Oil refining                    | x |  |   |  |
| Refined gasses  | Coal to gas w/o CCS             | x |  |   |  |
|                 | Coal to gas w/ CCS              |   |  | x |  |
|                 | Oil to gas w/o CCS              | x |  |   |  |
|                 | Oil to gas w/ CCS               |   |  | x |  |
|                 | Biomass to gas w/o CCS          | x |  |   |  |
|                 | Biomass to gas w/ CCS           |   |  | x |  |
| Heat generation | Coal heat                       | x |  |   |  |
|                 | Natural gas heat                |   |  | x |  |
|                 | Oil heat                        | x |  |   |  |
|                 | Biomass heat                    | x |  |   |  |
|                 | Geothermal heat                 |   |  | x |  |
|                 | Solar thermal heat              |   |  | x |  |
|                 | CHP (coupled heat and           | x |  |   |  |

|                      |                 |  |   |   |                                                                                                                                                                                                               |
|----------------------|-----------------|--|---|---|---------------------------------------------------------------------------------------------------------------------------------------------------------------------------------------------------------------|
|                      | power)          |  |   |   |                                                                                                                                                                                                               |
| Grid Infra Structure | Electricity     |  | x |   | Electricity generation and end-use energy demand (buildings, transportation, and industry) are modeled at the provincial level in GCAM-China, and the model allows for electricity trade within grid regions. |
|                      | Gas             |  |   | x |                                                                                                                                                                                                               |
|                      | Heat            |  |   | x |                                                                                                                                                                                                               |
|                      | CO <sub>2</sub> |  | x |   | Geologic carbon storage potentials and costs are represented at the grid-region level.                                                                                                                        |
|                      | Hydrogen        |  |   | x |                                                                                                                                                                                                               |

**Table SM1D: Energy end-use**

| Dimension                | Sub-Dimension              | Endogenous | Exogenous | Not Included | Details                                                                                            |
|--------------------------|----------------------------|------------|-----------|--------------|----------------------------------------------------------------------------------------------------|
| Passenger transportation | Passenger trains           | x          |           |              | liquid fuels (standard and advanced), electric (standard and advanced), high speed rail (electric) |
|                          | Buses                      | x          |           |              |                                                                                                    |
|                          | CNG Buses                  | x          |           |              |                                                                                                    |
|                          | Electric Buses             |            |           | x            |                                                                                                    |
|                          | Light Duty Vehicles (LDVs) | x          |           |              | 2 size classes (Car, Large Car and Truck)                                                          |
|                          | Gasoline LDVs              | x          |           |              | no distinction between gasoline and diesel internal combustion engine (ICE) vehicles               |
|                          | Diesel LDVs                |            |           | x            |                                                                                                    |
|                          | Hybrid LDVs                | x          |           |              |                                                                                                    |
|                          | Electric LDVs              | x          |           |              |                                                                                                    |
|                          | Hydrogen LDVs              | x          |           |              |                                                                                                    |
|                          | Passenger aircrafts        | x          |           |              |                                                                                                    |
|                          | Diesel Three-wheelers      | x          |           |              |                                                                                                    |
|                          | CNG Three-wheelers         |            |           | x            |                                                                                                    |
|                          | Electric Three-wheelers    | x          |           |              |                                                                                                    |
| LPG/CNG LDVs             | x                          |            |           |              |                                                                                                    |
| Freight transportation   | Freight trains             | x          |           |              | coal, liquid fuels (standard and advanced), electric (standard and advanced)                       |

|                       |                           |   |  |   |                                                                                                                                                                      |
|-----------------------|---------------------------|---|--|---|----------------------------------------------------------------------------------------------------------------------------------------------------------------------|
|                       | Heavy duty vehicles       | x |  |   | 3 size classes (light truck, medium truck, heavy truck); liquid fuels and LPG/CNG for each                                                                           |
|                       | Freight aircrafts         |   |  | x |                                                                                                                                                                      |
|                       | Freight ships             | x |  |   |                                                                                                                                                                      |
| Industry              | Steel production          | x |  |   |                                                                                                                                                                      |
|                       | Aluminum production       |   |  | x | Included in GCAM but not currently included in GCAM-China                                                                                                            |
|                       | Cement production         | x |  |   |                                                                                                                                                                      |
|                       | Petrochemical production  |   |  | x | Included in GCAM but not currently included in GCAM-China                                                                                                            |
|                       | Plastics production       |   |  | x |                                                                                                                                                                      |
|                       | Paper production          |   |  | x |                                                                                                                                                                      |
|                       | Pulp production           |   |  | x |                                                                                                                                                                      |
| Residential buildings | Space heating             | x |  |   | Electric (furnace), gas (furnace, high-efficiency), liquid fuel (furnace, high-efficiency), biomass (wood furnace), coal (furnace), heat (district heat)             |
|                       | Space cooling             | x |  |   | Electric (standard, high-efficiency)                                                                                                                                 |
|                       | Water heating and cooking | x |  |   | Gas (standard, high-efficiency), electric (resistance, resistance high-efficiency), liquid fuel (standard, high-efficiency), coal (standard), biomass (wood furnace) |
|                       | Lighting                  | x |  |   | Electric (standard)                                                                                                                                                  |
|                       | Appliances                | x |  |   | Electric (standard)                                                                                                                                                  |
| Commercial buildings  | Space heating             | x |  |   | Electric (furnace, heat pump), gas (furnace, high-efficiency), liquid fuel (fuel furnace), biomass (wood furnace), coal (furnace), heat (district heat)              |
|                       | Space cooling             | x |  |   | Electric (standard, high-efficiency), gas                                                                                                                            |
|                       | Water heating and cooking | x |  |   | Gas (standard, high-efficiency), electric (resistance), liquid fuel, coal (furnace)                                                                                  |
|                       | Lighting                  | x |  |   | Electric (standard)                                                                                                                                                  |
|                       | Appliances                | x |  |   | Electric (standard)                                                                                                                                                  |

**Table SM1E: Land use**

| Dimension                        | Sub-Dimension                  | Endogenous | Exogenous | Not Included | Details |
|----------------------------------|--------------------------------|------------|-----------|--------------|---------|
| Land cover                       | Cropland                       | x          |           |              |         |
|                                  | Cropland irrigated             | x          |           |              |         |
|                                  | Cropland food crops            | x          |           |              |         |
|                                  | Cropland feed crops            | x          |           |              |         |
|                                  | Cropland energy crops          | x          |           |              |         |
|                                  | Forest                         | x          |           |              |         |
|                                  | Managed forest                 | x          |           |              |         |
|                                  | Natural forest                 | x          |           |              |         |
|                                  | Pasture                        | x          |           |              |         |
|                                  | Shrubland                      | x          |           |              |         |
|                                  | Built-up area                  | x          |           |              |         |
| Agriculture and forestry demands | Agriculture food               | x          |           |              |         |
|                                  | Agriculture food crops         | x          |           |              |         |
|                                  | Agriculture food livestock     | x          |           |              |         |
|                                  | Agriculture feed               | x          |           |              |         |
|                                  | Agriculture feed crops         | x          |           |              |         |
|                                  | Agriculture feed livestock     | x          |           |              |         |
|                                  | Agriculture non-food           | x          |           |              |         |
|                                  | Agriculture non-food crops     | x          |           |              |         |
|                                  | Agriculture non-food livestock | x          |           |              |         |
|                                  | Agriculture bioenergy          | x          |           |              |         |
|                                  | Agriculture residues           | x          |           |              |         |
|                                  | Forest industrial roundwood    | x          |           |              |         |
|                                  | Forest fuelwood                | x          |           |              |         |

|                          |                            |   |  |  |  |
|--------------------------|----------------------------|---|--|--|--|
|                          | Forest residues            | x |  |  |  |
| Agricultural commodities | Wheat                      | x |  |  |  |
|                          | Rice                       | x |  |  |  |
|                          | Other coarse grains        | x |  |  |  |
|                          | Oilseeds                   | x |  |  |  |
|                          | Sugar crops                | x |  |  |  |
|                          | Ruminant meat              | x |  |  |  |
|                          | Non-ruminant meat and eggs | x |  |  |  |
|                          | Dairy products             | x |  |  |  |

**Table SM1F: Emissions, climate, and impacts**

| Dimension        | Sub-Dimension                | Endogenous | Exogenous | Not Included | Details                                                   |
|------------------|------------------------------|------------|-----------|--------------|-----------------------------------------------------------|
| Greenhouse gases | CO <sub>2</sub> fossil fuels | x          |           |              |                                                           |
|                  | CO <sub>2</sub> cement       | x          |           |              |                                                           |
|                  | CO <sub>2</sub> land use     | x          |           |              |                                                           |
|                  | CH <sub>4</sub> energy       | x          |           |              |                                                           |
|                  | CH <sub>4</sub> land use     | x          |           |              |                                                           |
|                  | CH <sub>4</sub> other        | x          |           |              |                                                           |
|                  | N <sub>2</sub> O energy      | x          |           |              |                                                           |
|                  | N <sub>2</sub> O land use    | x          |           |              |                                                           |
|                  | N <sub>2</sub> O other       | x          |           |              |                                                           |
|                  | CFCs                         |            |           | x            | Included in GCAM but not currently included in GCAM-China |
|                  | HFCs                         |            |           | x            | Included in GCAM but not currently included in GCAM-China |
|                  | SF <sub>6</sub>              |            |           | x            | Included in GCAM but not currently included in GCAM-China |
|                  | PFCs                         |            |           | x            | Included in GCAM but not currently included in GCAM-China |
| Pollutants       | CO energy                    |            |           | x            | Included in GCAM but not currently included in GCAM-China |
|                  | CO land use                  |            |           | x            | Included in GCAM but not currently included in GCAM-China |
|                  | CO other                     |            |           | x            | Included in GCAM but not currently included in GCAM-China |
|                  | NOx energy                   |            |           | x            | Included in GCAM but not currently included in GCAM-China |
|                  | NOx land use                 |            |           | x            | Included in GCAM but not currently included in GCAM-China |
|                  | NOx other                    |            |           | x            | Included in GCAM but not currently included in GCAM-China |

|                    |                                      |  |  |   |                                                           |
|--------------------|--------------------------------------|--|--|---|-----------------------------------------------------------|
|                    | VOC energy                           |  |  | x | Included in GCAM but not currently included in GCAM-China |
|                    | VOC land use                         |  |  | x | Included in GCAM but not currently included in GCAM-China |
|                    | VOC other                            |  |  | x | Included in GCAM but not currently included in GCAM-China |
|                    | SO <sub>2</sub> energy               |  |  | x | Included in GCAM but not currently included in GCAM-China |
|                    | SO <sub>2</sub> land use             |  |  | x | Included in GCAM but not currently included in GCAM-China |
|                    | SO <sub>2</sub> other                |  |  | x | Included in GCAM but not currently included in GCAM-China |
|                    | BC energy                            |  |  | x | Included in GCAM but not currently included in GCAM-China |
|                    | BC land use                          |  |  | x | Included in GCAM but not currently included in GCAM-China |
|                    | BC other                             |  |  | x | Included in GCAM but not currently included in GCAM-China |
|                    | OC energy                            |  |  | x | Included in GCAM but not currently included in GCAM-China |
|                    | OC land use                          |  |  | x | Included in GCAM but not currently included in GCAM-China |
|                    | OC other                             |  |  | x | Included in GCAM but not currently included in GCAM-China |
|                    | NH <sub>3</sub> energy               |  |  | x | Included in GCAM but not currently included in GCAM-China |
|                    | NH <sub>3</sub> land use             |  |  | x | Included in GCAM but not currently included in GCAM-China |
|                    | NH <sub>3</sub> other                |  |  | x | Included in GCAM but not currently included in GCAM-China |
| Climate indicators | Concentration: CO <sub>2</sub>       |  |  | x | Included in GCAM but not currently included in GCAM-China |
|                    | Concentration: CH <sub>4</sub>       |  |  | x | Included in GCAM but not currently included in GCAM-China |
|                    | Concentration: N <sub>2</sub> O      |  |  | x | Included in GCAM but not currently included in GCAM-China |
|                    | Concentration: Kyoto gases           |  |  | x | Included in GCAM but not currently included in GCAM-China |
|                    | Radiative forcing: CO <sub>2</sub>   |  |  | x | Included in GCAM but not currently included in GCAM-China |
|                    | Radiative forcing: CH <sub>4</sub>   |  |  | x | Included in GCAM but not currently included in GCAM-China |
|                    | Radiative forcing: N <sub>2</sub> O  |  |  | x | Included in GCAM but not currently included in GCAM-China |
|                    | Radiative forcing: F-gases           |  |  | x | Included in GCAM but not currently included in GCAM-China |
|                    | Radiative forcing: Kyoto gases       |  |  | x | Included in GCAM but not currently included in GCAM-China |
|                    | Radiative forcing: aerosols          |  |  | x | Included in GCAM but not currently included in GCAM-China |
|                    | Radiative forcing: land albedo       |  |  | x | Included in GCAM but not currently included in GCAM-China |
|                    | Radiative forcing: AN <sub>3</sub> A |  |  | x | Included in GCAM but not currently included in GCAM-China |
|                    | Radiative forcing: total             |  |  | x | Included in GCAM but not currently included in GCAM-China |
|                    | Temperature change                   |  |  | x | Included in GCAM but not currently included in GCAM-China |

|                 |         |                                                         |   |   |   |                                                           |                                                   |
|-----------------|---------|---------------------------------------------------------|---|---|---|-----------------------------------------------------------|---------------------------------------------------|
| Carbon removal  | dioxide | Bioenergy with CCS                                      | x |   |   |                                                           |                                                   |
|                 |         | Reforestation                                           | x |   |   |                                                           |                                                   |
|                 |         | Afforestation                                           | x |   |   |                                                           |                                                   |
|                 |         | Soil carbon enhancement                                 |   |   | x |                                                           |                                                   |
|                 |         | Direct air capture                                      |   |   | x |                                                           |                                                   |
|                 |         | Enhanced weathering                                     |   |   | x |                                                           |                                                   |
| Climate impacts | change  | Agriculture                                             |   | x |   | Not included by default but possible to implement         |                                                   |
|                 |         | Energy supply                                           |   |   | x |                                                           |                                                   |
|                 |         | Energy demand                                           | x |   |   |                                                           | Not included by default but possible to implement |
|                 |         | Economic output                                         |   |   | x |                                                           |                                                   |
|                 |         | Built capital                                           |   |   | x |                                                           |                                                   |
| Co-Linkages     |         | Energy security: Fossil fuel imports & exports (region) | x |   |   |                                                           |                                                   |
|                 |         | Energy access: Household energy consumption             | x |   |   |                                                           |                                                   |
|                 |         | Air pollution & health: Source-based aerosol emissions  |   |   | x | Included in GCAM but not currently included in GCAM-China |                                                   |
|                 |         | Air pollution & health: Health impacts of air Pollution |   |   | x |                                                           |                                                   |
|                 |         | Food access                                             | x |   |   |                                                           |                                                   |
|                 |         | Water availability                                      | x |   |   |                                                           |                                                   |
|                 |         | Biodiversity                                            |   |   | x |                                                           |                                                   |

**Table SM2: GCAM-China Reference scenario Socioeconomic Assumptions**

## GCAM-China Reference scenario Population (million persons)

| Region | 2015  | 2021  | 2025  | 2030  | 2035  | 2040  | 2045  | 2050  | 2055  | 2060  | 2065  | 2070  | 2075 | 2080 | 2085 | 2090 | 2095 | 2100 |
|--------|-------|-------|-------|-------|-------|-------|-------|-------|-------|-------|-------|-------|------|------|------|------|------|------|
| AH     | 61.6  | 63.4  | 63.1  | 62.4  | 61.1  | 59.5  | 57.6  | 55.5  | 53.2  | 50.8  | 48.4  | 46.0  | 43.7 | 41.5 | 39.3 | 37.2 | 35.2 | 33.5 |
| BJ     | 21.8  | 21.9  | 22.7  | 23.5  | 24.0  | 24.2  | 24.1  | 23.8  | 23.3  | 22.5  | 21.6  | 20.7  | 19.6 | 18.6 | 17.6 | 16.7 | 15.8 | 15.0 |
| CQ     | 30.3  | 31.4  | 31.9  | 32.1  | 32.1  | 31.8  | 31.2  | 30.4  | 29.3  | 28.2  | 27.0  | 25.7  | 24.4 | 23.2 | 21.9 | 20.8 | 19.7 | 18.7 |
| FJ     | 38.5  | 39.9  | 40.3  | 40.5  | 40.4  | 39.9  | 39.0  | 37.9  | 36.6  | 35.1  | 33.6  | 32.0  | 30.4 | 28.8 | 27.3 | 25.8 | 24.5 | 23.3 |
| GS     | 26.1  | 26.4  | 26.2  | 25.9  | 25.3  | 24.6  | 23.8  | 22.9  | 22.0  | 21.0  | 20.0  | 19.0  | 18.1 | 17.1 | 16.2 | 15.3 | 14.5 | 13.8 |
| GD     | 108.8 | 116.8 | 120.2 | 123.3 | 125.0 | 125.3 | 124.3 | 122.1 | 118.9 | 114.8 | 110.1 | 105.1 | 99.9 | 94.7 | 89.7 | 84.9 | 80.5 | 76.4 |
| GX     | 48.1  | 49.3  | 48.8  | 47.9  | 46.7  | 45.2  | 43.6  | 41.8  | 40.0  | 38.1  | 36.2  | 34.5  | 32.8 | 31.1 | 29.4 | 27.8 | 26.4 | 25.1 |
| GZ     | 35.4  | 36.0  | 35.7  | 35.0  | 34.1  | 33.1  | 31.9  | 30.6  | 29.3  | 27.9  | 26.6  | 25.3  | 24.0 | 22.8 | 21.6 | 20.4 | 19.3 | 18.4 |
| HI     | 9.1   | 9.5   | 9.6   | 9.7   | 9.7   | 9.6   | 9.4   | 9.2   | 8.9   | 8.5   | 8.2   | 7.8   | 7.4  | 7.0  | 6.6  | 6.3  | 6.0  | 5.7  |
| HE     | 74.5  | 76.2  | 76.9  | 77.2  | 76.7  | 75.7  | 74.0  | 71.8  | 69.3  | 66.5  | 63.5  | 60.5  | 57.5 | 54.6 | 51.6 | 48.9 | 46.3 | 44.0 |
| HL     | 38.2  | 37.0  | 36.1  | 34.9  | 33.6  | 32.2  | 30.7  | 29.3  | 27.8  | 26.4  | 25.0  | 23.8  | 22.6 | 21.4 | 20.3 | 19.2 | 18.2 | 17.3 |
| HA     | 95.1  | 95.6  | 94.4  | 92.4  | 89.9  | 86.9  | 83.6  | 80.1  | 76.5  | 72.8  | 69.2  | 65.8  | 62.6 | 59.3 | 56.2 | 53.2 | 50.4 | 47.9 |
| HB     | 58.7  | 59.0  | 58.7  | 57.9  | 56.7  | 55.2  | 53.4  | 51.4  | 49.2  | 46.9  | 44.7  | 42.6  | 40.4 | 38.3 | 36.3 | 34.4 | 32.6 | 30.9 |
| HN     | 68.0  | 69.4  | 70.1  | 70.4  | 70.0  | 69.0  | 67.5  | 65.6  | 63.2  | 60.7  | 58.0  | 55.2  | 52.5 | 49.8 | 47.1 | 44.6 | 42.3 | 40.2 |
| NM     | 25.2  | 25.3  | 25.1  | 24.7  | 24.2  | 23.5  | 22.8  | 21.9  | 20.9  | 20.0  | 19.0  | 18.1  | 17.2 | 16.3 | 15.4 | 14.6 | 13.9 | 13.2 |
| JS     | 80.0  | 80.3  | 79.8  | 78.6  | 76.9  | 74.8  | 72.3  | 69.5  | 66.5  | 63.5  | 60.5  | 57.5  | 54.7 | 51.8 | 49.1 | 46.5 | 44.0 | 41.8 |
| JX     | 45.8  | 46.6  | 46.6  | 46.3  | 45.6  | 44.6  | 43.3  | 41.8  | 40.2  | 38.4  | 36.6  | 34.9  | 33.2 | 31.4 | 29.8 | 28.2 | 26.7 | 25.4 |
| JL     | 27.6  | 26.5  | 25.9  | 25.0  | 24.0  | 22.9  | 21.9  | 20.8  | 19.7  | 18.7  | 17.7  | 16.8  | 16.0 | 15.2 | 14.4 | 13.6 | 12.9 | 12.3 |
| LN     | 43.9  | 43.1  | 42.3  | 41.2  | 39.8  | 38.4  | 36.8  | 35.1  | 33.4  | 31.8  | 30.2  | 28.7  | 27.3 | 25.9 | 24.5 | 23.2 | 22.0 | 20.9 |
| NX     | 6.7   | 7.0   | 7.2   | 7.3   | 7.3   | 7.3   | 7.2   | 7.0   | 6.8   | 6.5   | 6.3   | 6.0   | 5.7  | 5.4  | 5.1  | 4.8  | 4.6  | 4.4  |
| QH     | 5.9   | 6.1   | 6.2   | 6.2   | 6.2   | 6.2   | 6.1   | 5.9   | 5.7   | 5.5   | 5.2   | 5.0   | 4.7  | 4.5  | 4.3  | 4.0  | 3.8  | 3.6  |
| SN     | 38.0  | 38.6  | 38.5  | 38.0  | 37.3  | 36.3  | 35.2  | 33.9  | 32.4  | 31.0  | 29.5  | 28.1  | 26.7 | 25.3 | 24.0 | 22.7 | 21.5 | 20.4 |
| SD     | 98.7  | 100.8 | 101.2 | 100.9 | 99.8  | 97.9  | 95.3  | 92.3  | 88.8  | 85.0  | 81.1  | 77.3  | 73.4 | 69.6 | 65.9 | 62.4 | 59.2 | 56.2 |
| SH     | 24.2  | 24.5  | 24.9  | 25.1  | 25.2  | 24.9  | 24.5  | 23.9  | 23.1  | 22.3  | 21.3  | 20.3  | 19.3 | 18.3 | 17.3 | 16.4 | 15.5 | 14.8 |
| SX     | 36.7  | 37.5  | 38.0  | 38.2  | 38.1  | 37.7  | 37.0  | 36.0  | 34.7  | 33.4  | 31.9  | 30.4  | 28.9 | 27.4 | 25.9 | 24.5 | 23.3 | 22.1 |
| SC     | 82.3  | 83.2  | 82.4  | 80.8  | 78.8  | 76.4  | 73.6  | 70.7  | 67.5  | 64.4  | 61.2  | 58.3  | 55.4 | 52.5 | 49.7 | 47.0 | 44.6 | 42.4 |
| TJ     | 15.5  | 16.2  | 17.4  | 18.7  | 19.7  | 20.5  | 21.0  | 21.2  | 21.0  | 20.6  | 19.9  | 19.1  | 18.1 | 17.2 | 16.3 | 15.4 | 14.6 | 13.9 |
| XZ     | 3.2   | 3.6   | 3.7   | 3.9   | 4.0   | 4.1   | 4.1   | 4.1   | 4.0   | 3.9   | 3.7   | 3.6   | 3.4  | 3.2  | 3.0  | 2.9  | 2.7  | 2.6  |
| XJ     | 23.7  | 25.7  | 26.7  | 27.7  | 28.4  | 28.7  | 28.7  | 28.3  | 27.7  | 26.9  | 25.8  | 24.7  | 23.4 | 22.2 | 21.0 | 19.9 | 18.9 | 17.9 |
| YN     | 47.5  | 48.6  | 48.8  | 48.6  | 48.1  | 47.2  | 45.9  | 44.5  | 42.8  | 41.0  | 39.1  | 37.2  | 35.4 | 33.5 | 31.8 | 30.1 | 28.5 | 27.1 |
| ZJ     | 55.5  | 59.0  | 60.2  | 61.1  | 61.3  | 61.0  | 60.1  | 58.7  | 56.9  | 54.8  | 52.5  | 50.0  | 47.5 | 45.1 | 42.7 | 40.4 | 38.3 | 36.4 |

GCAM-China Reference scenario GDP (billion 2015 USD)

| Region | 2015 | 2021 | 2025 | 2030 | 2035 | 2040 | 2045 | 2050 | 2055 | 2060 | 2065 | 2070 | 2075 | 2080 | 2085 | 2090 | 2095 | 2100 |
|--------|------|------|------|------|------|------|------|------|------|------|------|------|------|------|------|------|------|------|
| AH     | 207  | 317  | 397  | 489  | 567  | 637  | 667  | 716  | 753  | 786  | 815  | 840  | 859  | 876  | 888  | 897  | 905  | 912  |
| BJ     | 209  | 302  | 376  | 457  | 522  | 574  | 585  | 608  | 616  | 616  | 608  | 594  | 574  | 553  | 530  | 506  | 482  | 459  |
| CQ     | 138  | 202  | 255  | 316  | 369  | 415  | 434  | 465  | 486  | 504  | 517  | 526  | 530  | 533  | 532  | 530  | 528  | 524  |
| FJ     | 233  | 360  | 446  | 541  | 616  | 679  | 696  | 729  | 748  | 759  | 763  | 762  | 754  | 743  | 729  | 713  | 695  | 678  |
| GS     | 55   | 75   | 97   | 123  | 147  | 170  | 183  | 203  | 220  | 237  | 254  | 270  | 285  | 300  | 313  | 327  | 340  | 354  |
| GD     | 621  | 926  | 1174 | 1463 | 1710 | 1928 | 2015 | 2151 | 2240 | 2305 | 2344 | 2360 | 2354 | 2337 | 2309 | 2273 | 2234 | 2194 |
| GX     | 135  | 182  | 230  | 286  | 335  | 382  | 405  | 440  | 470  | 498  | 524  | 549  | 572  | 593  | 611  | 628  | 644  | 660  |
| GZ     | 90   | 144  | 181  | 224  | 262  | 297  | 313  | 340  | 361  | 381  | 399  | 417  | 432  | 446  | 458  | 468  | 478  | 488  |
| HI     | 31   | 46   | 59   | 74   | 87   | 100  | 107  | 116  | 123  | 130  | 135  | 140  | 143  | 147  | 149  | 151  | 152  | 154  |
| HE     | 223  | 304  | 389  | 493  | 588  | 678  | 726  | 796  | 854  | 907  | 955  | 998  | 1034 | 1068 | 1096 | 1122 | 1146 | 1170 |
| HL     | 98   | 116  | 146  | 181  | 211  | 239  | 254  | 276  | 296  | 315  | 333  | 352  | 370  | 387  | 403  | 418  | 432  | 447  |
| HA     | 319  | 462  | 574  | 702  | 809  | 905  | 944  | 1010 | 1061 | 1106 | 1147 | 1183 | 1213 | 1239 | 1258 | 1274 | 1287 | 1300 |
| HB     | 262  | 389  | 480  | 582  | 664  | 734  | 756  | 798  | 827  | 849  | 866  | 879  | 886  | 889  | 887  | 883  | 877  | 870  |
| HN     | 239  | 342  | 435  | 544  | 641  | 731  | 773  | 838  | 888  | 933  | 970  | 1002 | 1026 | 1047 | 1062 | 1074 | 1084 | 1093 |
| NM     | 118  | 146  | 182  | 221  | 254  | 283  | 293  | 312  | 325  | 336  | 345  | 353  | 358  | 362  | 364  | 365  | 365  | 365  |
| JS     | 586  | 836  | 1010 | 1192 | 1324 | 1426 | 1430 | 1471 | 1484 | 1485 | 1476 | 1460 | 1434 | 1402 | 1364 | 1323 | 1280 | 1238 |
| JX     | 143  | 212  | 268  | 334  | 391  | 444  | 469  | 507  | 538  | 565  | 589  | 611  | 628  | 644  | 656  | 666  | 676  | 684  |
| JL     | 87   | 100  | 124  | 151  | 175  | 196  | 205  | 221  | 234  | 247  | 259  | 271  | 281  | 291  | 300  | 308  | 316  | 323  |
| LN     | 176  | 211  | 261  | 317  | 364  | 405  | 420  | 448  | 469  | 488  | 504  | 520  | 532  | 543  | 551  | 558  | 563  | 568  |
| NX     | 23   | 32   | 42   | 53   | 64   | 73   | 79   | 86   | 92   | 97   | 102  | 105  | 108  | 111  | 113  | 115  | 116  | 118  |
| QH     | 19   | 26   | 33   | 42   | 50   | 58   | 62   | 68   | 72   | 77   | 81   | 84   | 87   | 90   | 92   | 94   | 95   | 97   |
| SN     | 147  | 220  | 273  | 334  | 385  | 430  | 447  | 477  | 498  | 516  | 531  | 543  | 552  | 559  | 562  | 564  | 565  | 565  |
| SD     | 456  | 607  | 760  | 935  | 1083 | 1214 | 1265 | 1351 | 1412 | 1462 | 1503 | 1534 | 1553 | 1566 | 1571 | 1571 | 1568 | 1564 |
| SH     | 230  | 322  | 394  | 471  | 528  | 573  | 576  | 593  | 597  | 594  | 586  | 573  | 555  | 536  | 514  | 492  | 470  | 449  |
| SX     | 101  | 148  | 190  | 242  | 289  | 334  | 359  | 395  | 425  | 452  | 476  | 498  | 517  | 534  | 548  | 562  | 574  | 587  |
| SC     | 263  | 397  | 495  | 608  | 703  | 789  | 825  | 884  | 931  | 972  | 1009 | 1042 | 1069 | 1092 | 1110 | 1124 | 1137 | 1149 |
| TJ     | 98   | 124  | 164  | 215  | 262  | 308  | 332  | 364  | 388  | 406  | 417  | 422  | 422  | 420  | 415  | 410  | 404  | 397  |
| XZ     | 9    | 15   | 20   | 26   | 32   | 38   | 42   | 46   | 51   | 54   | 57   | 60   | 62   | 64   | 65   | 67   | 68   | 69   |
| XJ     | 81   | 119  | 156  | 203  | 247  | 289  | 314  | 347  | 375  | 399  | 419  | 435  | 447  | 458  | 466  | 473  | 479  | 485  |
| YN     | 132  | 200  | 255  | 320  | 379  | 433  | 462  | 503  | 538  | 569  | 597  | 622  | 644  | 664  | 680  | 695  | 708  | 722  |
| ZJ     | 367  | 532  | 664  | 813  | 935  | 1039 | 1070 | 1128 | 1161 | 1182 | 1191 | 1190 | 1178 | 1162 | 1139 | 1114 | 1087 | 1059 |

**Table SM3: Key technological and economic parameters for industrial sector**

| Supply sector                     |                            | Technology    | Price elasticity         | Minicam input                            | Cost    |
|-----------------------------------|----------------------------|---------------|--------------------------|------------------------------------------|---------|
| <b>1. agricultural energy use</b> |                            | biomass       | -0.4                     | delivered biomass                        | 18.8400 |
|                                   |                            | coal          | -0.4                     | delivered coal                           | 5.0000  |
|                                   |                            | district heat | -0.4                     | heat                                     | 5.0000  |
|                                   |                            | electricity   | -0.4                     | elect_td_ind                             | 29.7672 |
|                                   |                            | gas           | -0.4                     | wholesale gas                            | 18.8400 |
|                                   |                            | hydrogen      | -0.4                     | H2 industrial                            | 22.6080 |
|                                   |                            | liquid        | -0.4                     | refined liquids industry                 | 18.8400 |
| <b>2. chemical</b>                | <b>direct cost</b>         | chemical      | -0.4                     | chemical energy use; chemical feedstocks | 25.0000 |
|                                   | <b>chemical energy use</b> | biomass       | -0.4                     | delivered biomass                        | 3.0000  |
|                                   |                            | coal          | -0.4                     | delivered coal                           | 3.0000  |
|                                   |                            | coal CCS      | -0.4                     | delivered coal                           | 3.5000  |
|                                   |                            | district heat | -0.4                     | heat                                     | 3.0000  |
|                                   |                            | electricity   | -0.4                     | elect_td_ind                             | 0.5447  |
|                                   |                            | gas           | -0.4                     | wholesale gas                            | 3.0000  |
|                                   |                            | gas CCS       | -0.4                     | wholesale gas                            | 3.5000  |
|                                   |                            | hydrogen      | -0.4                     | H2 industrial                            | 3.0000  |
|                                   |                            | liquid        | -0.4                     | refined liquids industry                 | 3.0000  |
|                                   |                            | liquid CCS    | -0.4                     | refined liquids industry                 | 3.5000  |
|                                   | <b>chemical feedstocks</b> | coal          | -0.4                     | delivered coal                           | 3.0000  |
|                                   |                            | gas           | -0.4                     | wholesale gas                            | 3.0000  |
| liquid                            |                            | -0.4          | refined liquids industry | 3.0000                                   |         |
| <b>3. coke</b>                    |                            | coke          | -0.4                     | coke                                     | 0.0046  |

|                              |                                    |                    |      |                                                                      |         |
|------------------------------|------------------------------------|--------------------|------|----------------------------------------------------------------------|---------|
|                              |                                    | coke CCS           | -0.4 | coke                                                                 | 0.0084  |
| <b>4.<br/>construction</b>   | <b>direct cost</b>                 | construction       | -0.4 | construction energy use;<br>construction feedstocks                  | 3.0000  |
|                              | <b>construction<br/>energy use</b> | biomass            | -0.4 | delivered biomass                                                    | 55.5600 |
|                              |                                    | coal               | -0.4 | delivered coal                                                       | 5.0000  |
|                              |                                    | district heat      | -0.4 | heat                                                                 | 5.0000  |
|                              |                                    | electricity        | -0.4 | elect_td_ind                                                         | 87.7848 |
|                              |                                    | gas                | -0.4 | wholesale gas                                                        | 55.5600 |
|                              |                                    | hydrogen           | -0.4 | H2 industrial                                                        | 66.6720 |
|                              |                                    | liquid             | -0.4 | refined liquids industry                                             | 55.5600 |
|                              | <b>construction<br/>feedstocks</b> | coal               | -0.4 | delivered coal                                                       | 0.9951  |
|                              |                                    | gas                | -0.4 | wholesale gas                                                        | 18.8400 |
|                              |                                    | liquid             | -0.4 | refined liquids industry                                             | 18.8400 |
| <b>5. iron and<br/>steel</b> | <b>BLASTFUR</b>                    | Biomass-based      | -0.1 | delivered biomass;<br>elect_td_ind                                   | 0.0832  |
|                              |                                    | BLASTFUR           | -0.1 | coke; elect_td_ind; refined<br>liquids industrial; delivered<br>coal | 0.1122  |
|                              |                                    | BLASTFUR CCS       | -0.1 | coke; elect_td_ind; refined<br>liquids industrial; delivered<br>coal | 0.1372  |
|                              | <b>EAF with<br/>DRI</b>            | EAF with DRI       | -0.1 | elect_td_ind; refined liquids<br>industrial; wholesale gas           | 0.1214  |
|                              |                                    | EAF with DRI CCS   | -0.1 | elect_td_ind; refined liquids<br>industrial; wholesale gas           | 0.1224  |
|                              |                                    | Hydrogen-based DRI | -0.1 | elect_td_ind; refined liquids<br>industrial; scrap                   | 0.0978  |

|                             |                       |                |      |                             |         |
|-----------------------------|-----------------------|----------------|------|-----------------------------|---------|
|                             | <b>EAF with scrap</b> | EAF with scrap | -0.1 | H2 industrial; elect_td_ind | 0.0442  |
| <b>6. mining energy use</b> |                       | biomass        | -0.4 | delivered biomass           | 37.0500 |
|                             |                       | coal           | -0.4 | delivered coal              | 5.0000  |
|                             |                       | district heat  | -0.4 | heat                        | 5.0000  |
|                             |                       | electricity    | -0.4 | elect_td_ind                | 58.5390 |
|                             |                       | gas            | -0.4 | wholesale gas               | 37.0500 |
|                             |                       | hydrogen       | -0.4 | H2 industrial               | 44.4600 |
|                             |                       | liquid         | -0.4 | refined liquids industry    | 37.0500 |

*Note: the unit for cost is 1975\$/kg for coke and iron and steel 1975\$/GJ for others*

**Table SM4: Province-to-basin mappings**

| <b>Basin</b>                  | <b>Province</b>                                                                                                                      |
|-------------------------------|--------------------------------------------------------------------------------------------------------------------------------------|
| Russia South East Coast       | Heilongjiang, Jilin                                                                                                                  |
| Gobi Interior                 | Gansu, Inner Mongolia, Qinghai, Xinjiang                                                                                             |
| Amur                          | Heilongjiang, Jilin, Inner Mongolia                                                                                                  |
| Ob                            | Xinjiang                                                                                                                             |
| Bo Hai Korean Bay North Coast | Hebei, Jilin, Liaoning, Inner Mongolia                                                                                               |
| Lake Balkash                  | Xinjiang                                                                                                                             |
| Ziya He Interior              | Beijing, Henan, Hebei, Liaoning, Inner Mongolia, Shandong, Shanxi, Tianjin                                                           |
| China Coast                   | Anhui, Fujian, Guangdong, Jiangsu, Jiangxi, Shandong, Shanghai, Zhejiang                                                             |
| Huang He                      | Gansu, Henan, Inner Mongolia, Ningxia, Qinghai, Sichuan, Shandong, Shaanxi, Shanxi                                                   |
| Tarim Interior                | Gansu, Qinghai, Xinjiang, Tibet                                                                                                      |
| Indus                         | Xinjiang, Tibet                                                                                                                      |
| Plateau of Tibet Interior     | Qinghai, Tibet                                                                                                                       |
| Yangtze                       | Anhui, Chongqing, Gansu, Guangxi, Guizhou, Henan, Hubei, Hunan, Jiangsu, Jiangxi, Qinghai, Sichuan, Shandong, Shaanxi, Tibet, Yunnan |
| Xun Jiang                     | Guangdong, Guangxi, Guizhou, Hunan, Yunnan                                                                                           |
| Hong (Red River)              | Yunnan                                                                                                                               |
| Ganges Bramaputra             | Tibet                                                                                                                                |
| South China Sea Coast         | Guangdong, Guangxi                                                                                                                   |
| Hainan                        | Hainan                                                                                                                               |
| Mekong                        | Qinghai, Tibet, Yunan                                                                                                                |

|           |               |
|-----------|---------------|
| Salween   | Tibet, Yunnan |
| Irrawaddy | Tibet, Yunnan |

**Table SM5: GCAM-China Grid Regions**

| <u>Province</u> | <u>Subregion</u> | <u>Province.name</u> | <u>GB.Code</u> | <u>Climate.region</u> | <u>Grid.region</u>        |
|-----------------|------------------|----------------------|----------------|-----------------------|---------------------------|
| AH              | East China       | Anhui                | 34             | HSCW                  | East China Grid           |
| BJ              | North China      | Beijing              | 11             | C                     | North China Grid          |
| CQ              | Southwest        | Chongqing            | 50             | HSCW                  | Central China Grid        |
| FJ              | East China       | Fujian               | 35             | HSWW                  | East China Grid           |
| GD              | South China      | Guangdong            | 44             | HSWW                  | China Southern Power Grid |
| GS              | Northwest        | Gansu                | 62             | C                     | Northwest China Grid      |
| GX              | South China      | Guangxi              | 45             | HSWW                  | China Southern Power Grid |
| GZ              | Southwest        | Guizhou              | 52             | HSCW                  | China Southern Power Grid |
| HA              | South China      | Henan                | 41             | C                     | Central China Grid        |
| HB              | South China      | Hubei                | 42             | HSCW                  | Central China Grid        |
| HE              | North China      | Hebei                | 13             | C                     | North China Grid          |
| HI              | South China      | Hainan               | 46             | HSWW                  | China Southern Power Grid |
| HL              | Northeast        | Heilongjiang         | 23             | SC                    | Northeast China Grid      |
| HN              | South China      | Hunan                | 43             | HSCW                  | Central China Grid        |
| JL              | Northeast        | Jilin                | 22             | SC                    | Northeast China Grid      |
| JS              | East China       | Jiangsu              | 32             | HSCW                  | East China Grid           |
| JX              | East China       | Jiangxi              | 36             | HSCW                  | Central China Grid        |
| LN              | Northeast        | Liaoning             | 21             | SC                    | Northeast China Grid      |
| NM              | North China      | Inner Mongolia       | 15             | SC                    | North China Grid          |
| NX              | Northwest        | Ningxia              | 64             | SC                    | Northwest China Grid      |
| QH              | Northwest        | Qinghai              | 63             | SC                    | Northwest China Grid      |
| SC              | Southwest        | Sichuan              | 51             | HSCW                  | Central China Grid        |
| SD              | East China       | Shandong             | 37             | C                     | North China Grid          |
| SH              | East China       | Shanghai             | 31             | HSCW                  | East China Grid           |
| SN              | Northwest        | Shaanxi              | 61             | C                     | Northwest China Grid      |
| SX              | North China      | Shanxi               | 14             | C                     | North China Grid          |
| TJ              | North China      | Tianjin              | 12             | C                     | North China Grid          |
| XJ              | Northwest        | Xinjiang             | 65             | SC                    | Northwest China Grid      |
| YN              | Southwest        | Yunnan               | 53             | HSCW                  | China Southern Power Grid |
| ZJ              | East China       | Zhejiang             | 33             | HSCW                  | East China Grid           |

**Table SM6: Key Input Data Sources for GCAM-China Calibration**

| <u>File Name</u>                  | <u>Description</u>                                                                                                                                                                                                                                                                                                                                                                                                                   |
|-----------------------------------|--------------------------------------------------------------------------------------------------------------------------------------------------------------------------------------------------------------------------------------------------------------------------------------------------------------------------------------------------------------------------------------------------------------------------------------|
| A_ExoShutdownScalar.csv           | Maximum proportion of vintage that can be deployed for exogenous shutdown decider.                                                                                                                                                                                                                                                                                                                                                   |
| A44.hab_land_flsp_china.csv       | Provincial administrative area data for China are derived from the Second National Land Survey and previous land change surveys, as provided by the Ministry of Natural Resources' National Land Survey Database ( <a href="https://gtdc.mnr.gov.cn/Share#/secondSurvey">https://gtdc.mnr.gov.cn/Share#/secondSurvey</a> )                                                                                                           |
| China_Compendum_of_Statistics.csv | Historical population data by province in China are derived from the China Compendium of Statistics (60-year statistics)                                                                                                                                                                                                                                                                                                             |
| China_Statistics_Yearbook.csv     | Provincial population data for China covering the period 2000–2019 are based on the Annual National Sample Survey of Population                                                                                                                                                                                                                                                                                                      |
| biofuel_MT_province_F.csv         | Ethanol and biodiesel production data for Chinese provinces are compiled based on the APEC Expert Group on New and Renewable Energy Technologies (EGNRET) dataset available at the project archive ( <a href="http://www.egnret.ewg.apec.org/Archive/me_china.html">http://www.egnret.ewg.apec.org/Archive/me_china.html</a> )                                                                                                       |
| CPSY_GWh_province_F_elec_out.csv  | Provincial-level electricity generation by fuel in China, expressed in units of 100 GWh, is compiled based on the China Power Statistical Yearbook.                                                                                                                                                                                                                                                                                  |
| detailed_industry_output.csv      | Provincial-level detailed industry output data, expressed in Mt (for steel and coke production) and EJ (for energy consumption), are compiled based on the China Statistical Yearbook and the MEIC-HR Emissions Inventory, with facility-level energy consumption data aggregated to the provincial level.                                                                                                                           |
| en_balance_Mtce_Yh_province.csv   | Provincial energy balance data for China are reported in million tons of coal equivalent (Mtce). The data are derived from the China Statistical Yearbook, accessed via the Lawrence Berkeley National Laboratory (LBL) China Energy Databook (v9). For years prior to 2014, values follow the Databook records; 2015 values are assumed to be identical to those of 2014; 2021 values follow the China Energy Statistical Yearbook. |
| floorspace_m2_province_Yh.csv     | Historical per capita floorspace for urban and rural households derived from provincial statistical yearbooks.                                                                                                                                                                                                                                                                                                                       |
| future_hydro_gen_EJ.csv           | Planned hydro electricity generation. 2020,2021 values are derived from NEA; 2025 value are derived from WEO 2019 Current Policies Scenario; other value are derived                                                                                                                                                                                                                                                                 |

|                                   |                                                                                                                                                                                                                                                                                                                                                                                                                                                                                                                                                                                                                                                                                                                                                                                                                                                                                                                                                                                            |
|-----------------------------------|--------------------------------------------------------------------------------------------------------------------------------------------------------------------------------------------------------------------------------------------------------------------------------------------------------------------------------------------------------------------------------------------------------------------------------------------------------------------------------------------------------------------------------------------------------------------------------------------------------------------------------------------------------------------------------------------------------------------------------------------------------------------------------------------------------------------------------------------------------------------------------------------------------------------------------------------------------------------------------------------|
|                                   | from WEO2023 Stated Policies Scenario.                                                                                                                                                                                                                                                                                                                                                                                                                                                                                                                                                                                                                                                                                                                                                                                                                                                                                                                                                     |
| future_hydro_gen_EJ_adv.csv       | 2020,2021 values are derived from NEA; Other data are derived from WEO 2019 Sustainable Development Scenario.                                                                                                                                                                                                                                                                                                                                                                                                                                                                                                                                                                                                                                                                                                                                                                                                                                                                              |
| GDP_deflator.csv                  | GDP deflator, taking 2015 USD as base year.<br><a href="https://data.worldbank.org/indicator/NY.GDP.DEFL.ZS?locations=CN">https://data.worldbank.org/indicator/NY.GDP.DEFL.ZS?locations=CN</a>                                                                                                                                                                                                                                                                                                                                                                                                                                                                                                                                                                                                                                                                                                                                                                                             |
| gdp_mil10usd_province.csv         | Provincial GDP for China, expressed in million 2010 USD, is calculated for both historical and future periods based on provincial GDP per capita and population. Historical GDP per capita data for 2010–2019 are obtained from the National Bureau of Statistics (NBS) national data portal in current CNY, with values for 2010–2017 adjusted to reflect revisions from the Fourth National Economic Census. All historical figures are converted to 2010 CNY using China-specific GDP deflators from the World Bank World Development Indicators (2020) and subsequently converted to 2010 USD using the annual average USD–CNY exchange rate for 2010. GDP per capita for 2019–2021 is projected using growth rates from the IMF World Economic Outlook (April 2020), including adjustments for the COVID-19 shock in 2020, while long-term projections from 2022 to 2100 follow growth trajectories from the OECD ENV-Growth / IIASA SSP Database (Version 2.0, extracted July 2020). |
| GDP_raw.csv                       | Raw provincial GDP data for China in historical years are reported in units of 100 million RMB and are compiled from official national statistical sources using the CNKI data extraction platform, drawing on the China Statistical Yearbook and the China Compendium of Statistics (60-year statistics).                                                                                                                                                                                                                                                                                                                                                                                                                                                                                                                                                                                                                                                                                 |
| IMF_growth_rates.csv              | IMF GDP per capita growth rates-World Economic Outlook (April 2020)                                                                                                                                                                                                                                                                                                                                                                                                                                                                                                                                                                                                                                                                                                                                                                                                                                                                                                                        |
| IO_detailed_industry.csv          | Input-output data are calculated based on historical energy consumption sourced from the MEIC-HR emission inventory. The energy consumption data could not be used directly due to the inconsistency between IEA data(used in GCAM) and China's energy statistics so the energy consumption share was used to allocate.                                                                                                                                                                                                                                                                                                                                                                                                                                                                                                                                                                                                                                                                    |
| irrigation_shares_0p5degree.csv   | Livestock water withdrawals by China province; calibrated using historical total water use data from China's Water Resources Bulletin; copy 2015 to 2021 due to limited data constraints.                                                                                                                                                                                                                                                                                                                                                                                                                                                                                                                                                                                                                                                                                                                                                                                                  |
| livestock_water_withdrawals.csv   | Livestock water withdrawals by China province; copy 2015 to 2021 due to limited data constraints.                                                                                                                                                                                                                                                                                                                                                                                                                                                                                                                                                                                                                                                                                                                                                                                                                                                                                          |
| MEIC2015_province_vintage_gen.csv | Existing coal electricity generation data from 2015 for Chinese provinces for use in vintaging                                                                                                                                                                                                                                                                                                                                                                                                                                                                                                                                                                                                                                                                                                                                                                                                                                                                                             |

|                                                |                                                                                                                                                                                                                                                                                                                                                                                                                                                                                                                                                                                                                                                                                                                                                                                                                                                                                                                                                                                                                                                                                                                                                                |
|------------------------------------------------|----------------------------------------------------------------------------------------------------------------------------------------------------------------------------------------------------------------------------------------------------------------------------------------------------------------------------------------------------------------------------------------------------------------------------------------------------------------------------------------------------------------------------------------------------------------------------------------------------------------------------------------------------------------------------------------------------------------------------------------------------------------------------------------------------------------------------------------------------------------------------------------------------------------------------------------------------------------------------------------------------------------------------------------------------------------------------------------------------------------------------------------------------------------|
| Nuclear_incremental_fixed.csv                  | Electricity generation from nuclear by province                                                                                                                                                                                                                                                                                                                                                                                                                                                                                                                                                                                                                                                                                                                                                                                                                                                                                                                                                                                                                                                                                                                |
| Population_Growth_Rates.csv                    | Regional population growth rates are calculated based on historical population data                                                                                                                                                                                                                                                                                                                                                                                                                                                                                                                                                                                                                                                                                                                                                                                                                                                                                                                                                                                                                                                                            |
| population_thous_province.csv                  | Historical data (1975-2018) on national population were obtained from the 2019 China Statistics Yearbook and the China Compendium of 60-year Statistics (1949-2008) SSP growth rates were applied to project future population in China from 2020 to 2100.                                                                                                                                                                                                                                                                                                                                                                                                                                                                                                                                                                                                                                                                                                                                                                                                                                                                                                     |
| province_decile_gdp_per_capita_projections.csv | Province-level projections of GDP per capita deciles under different scenarios are provided to characterize the relative income distribution across Chinese provinces. The dataset reports decile classifications only; corresponding population and GDP values are intentionally left blank, as they are not updated within this dataset. The projections are based on scenario information from the JGCRI PRIDR repository ( <a href="https://github.com/JGCRI/pridr">https://github.com/JGCRI/pridr</a> ) and historical statistical context from the China Statistical Yearbook.                                                                                                                                                                                                                                                                                                                                                                                                                                                                                                                                                                           |
| regional_fuel_prices_RMB.csv                   | Provincial fuel price data for China are compiled for refined liquid fuels, natural gas, and coal, with units reported as 2014 RMB per ton for refined liquids, 2015 RMB per thousand cubic meters for natural gas, and 2015 RMB per ton for coal. Refined liquid fuel prices are based on the LBL China Key Energy Statistics diesel price cap for 2014; natural gas prices are obtained from the National Development and Reform Commission (NDRC) price notifications; and coal prices are derived from market data compiled by Coal-link. For Tibet, the diesel price is calculated as a consumption-weighted average of prices within its corresponding grid region using 2010 diesel consumption. Natural gas prices for Fujian and Tibet are similarly computed as grid-level weighted averages based on 2010 LNG and natural gas consumption. In provinces with multiple coal markets, coal prices are represented by the midpoint between the minimum and maximum observed market prices; where provincial coal price data are unavailable, grid-level consumption-weighted averages are applied, and for Guangxi the 2014 coal import price is used. |
| solar_csp_pv_capacityfactor.csv                | Capacity factor for centralized PV and CSP by province are derived from He and Kammen 2016.                                                                                                                                                                                                                                                                                                                                                                                                                                                                                                                                                                                                                                                                                                                                                                                                                                                                                                                                                                                                                                                                    |
| solar_potential_province.csv                   | Provincial-level supply curves are generated by Shen and Yin.                                                                                                                                                                                                                                                                                                                                                                                                                                                                                                                                                                                                                                                                                                                                                                                                                                                                                                                                                                                                                                                                                                  |
| unallocated_                                   | Provincial unallocated CO2 from PNNL's research based on Dahowski et al                                                                                                                                                                                                                                                                                                                                                                                                                                                                                                                                                                                                                                                                                                                                                                                                                                                                                                                                                                                                                                                                                        |

|                                     |                                                                                                                                                                                                                                                                                                                                                                                                                                                                                                                                                                                                                                                                             |
|-------------------------------------|-----------------------------------------------------------------------------------------------------------------------------------------------------------------------------------------------------------------------------------------------------------------------------------------------------------------------------------------------------------------------------------------------------------------------------------------------------------------------------------------------------------------------------------------------------------------------------------------------------------------------------------------------------------------------------|
| CStorage_province.csv               | (2010,2017) and Yu et al. (2018)                                                                                                                                                                                                                                                                                                                                                                                                                                                                                                                                                                                                                                            |
| urban_income_share_province.csv     | Urban population fraction in China provinces from China Statistical Yearbook                                                                                                                                                                                                                                                                                                                                                                                                                                                                                                                                                                                                |
| urban_population_share_province.csv | Urban population fraction in China provinces from China Statistical Yearbook 2018 Table 2-7.<br><a href="https://springernature.figshare.com/articles/dataset/Projected_provincial_urbanization_rate_for_China/9229841?backTo=%2Fcollections%2FProvincial_and_gridded_population_projection_for_China_under_shared_socioeconomic_pathways_from_2010_to_2100%2F4605713&amp;file=16809551">https://springernature.figshare.com/articles/dataset/Projected_provincial_urbanization_rate_for_China/9229841?backTo=%2Fcollections%2FProvincial_and_gridded_population_projection_for_China_under_shared_socioeconomic_pathways_from_2010_to_2100%2F4605713&amp;file=16809551</a> |
| water_km3_china_ind_Yh.csv          | China water withdrawal and consumption for industry, which are calculated using historical water withdrawal data from China's Water Resources Bulletin                                                                                                                                                                                                                                                                                                                                                                                                                                                                                                                      |
| wind_potential_province.csv         | Provincial-level supply curves are generated by Shen and Yin                                                                                                                                                                                                                                                                                                                                                                                                                                                                                                                                                                                                                |

**Figure SM1: Resource supply curves for onshore wind by province**

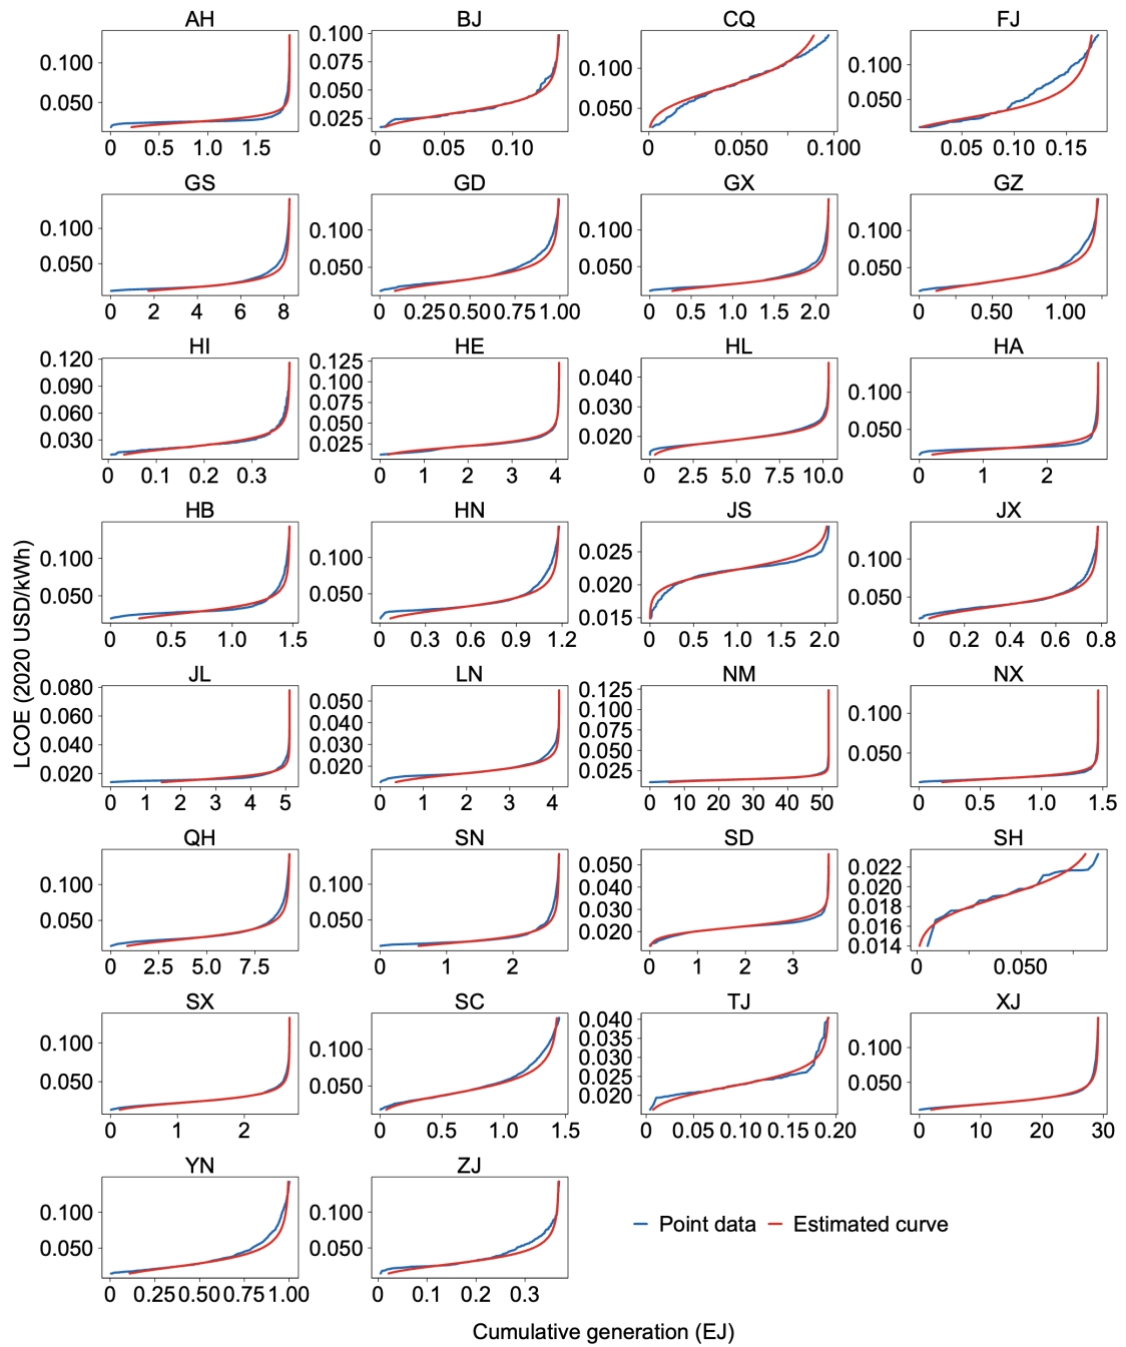

**Figure SM1. Resource supply curves for onshore wind by province**
